# Supplementary material
Source: PubMed Central journal article supplement (PMC2290751)
Supplement: pnas_0708451105_1.pdf [file pnas_0708451105_1.pdf]

**Table 2. Production of *ftk*-like phenotype by the knockdown of *nkx2.5***

| Amount of<br><i>nkx2.5</i> MO | No. injected | Phenotype, %     |           |              |
|-------------------------------|--------------|------------------|-----------|--------------|
|                               |              | <i>ftk</i> -like | Wild-type | Nonspecific* |
| 2 ng                          | 249          | 35.7             | 63.4      | 0.8          |
| 4 ng                          | 354          | 92.4             | 2.8       | 4.8          |
| 6 ng                          | 228          | 93.0             | 0.9       | 6.1          |
| Buffer-injected               | 106          | 0                | 100       | 0            |

\* Nonspecific phenotypes of tail or axis truncation.
