# Supplementary material
Source: PubMed Central journal article supplement (PMC2290751)
Supplement: pnas_0708451105_2.pdf [file pnas_0708451105_2.pdf]

**Table 3. Rescue of *ftk* mutant with *ecx* mRNA**

| mRNA injected, pg | No. surviving, <i>n</i> | <i>ftk</i> phenotype, % |
|-------------------|-------------------------|-------------------------|
| 0                 | 112                     | 25.0                    |
| 10                | 173                     | 21.9                    |
| 20                | 157                     | 9.1                     |
| 30                | 176                     | 1.7                     |
| 40                | 34                      | 0.0                     |
| 50                | 36                      | 0.0                     |

Fertilized eggs were obtained from crosses of *ftk* heterozygotes.
