# Supplementary material
Source: PubMed Central journal article supplement (PMC2290751)
Supplement: pnas_0708451105_3.pdf [file pnas_0708451105_3.pdf]

**Table 4. Rescue of *ftk* phenotype by *nkx2.5* mRNA**

| <i>nkx2.5</i> mRNA,<br>pg                                                              | <i>ecx</i> MO,<br>ng | No. surviving,<br><i>n</i> | <i>ftk</i> phenotype,<br>% | Non- <i>ftk</i> phenotypes, % |         |         |
|----------------------------------------------------------------------------------------|----------------------|----------------------------|----------------------------|-------------------------------|---------|---------|
|                                                                                        |                      |                            |                            | Edema*                        | No tail | No head |
| Injection into wild-type embryos                                                       |                      |                            |                            |                               |         |         |
| 0                                                                                      | 2                    | 328                        | 96.6                       | 0.9                           | 0       | 0       |
| 10                                                                                     | 2                    | 262                        | 2.7                        | 3.5                           | 0       | 0       |
| 25                                                                                     | 2                    | 207                        | 3.9                        | 43.0                          | 6.8     | 0       |
| 50                                                                                     | 2                    | 157                        | 1.9                        | 54.8                          | 19.7    | 7.0     |
| 10                                                                                     | 0                    | 194                        | 0                          | 11.4                          | 0       | 0       |
| 25                                                                                     | 0                    | 195                        | 0                          | 48.2                          | 5.1     | 0       |
| 50                                                                                     | 0                    | 161                        | 0                          | 50.5                          | 22.4    | 8.7     |
| Buffer                                                                                 | 0                    | 99                         | 0                          | 0                             | 0       | 0       |
| -----                                                                                  |                      |                            |                            |                               |         |         |
| Injection into embryos obtained from hetero ( <i>ftk/+</i> ) × hetero ( <i>ftk/+</i> ) |                      |                            |                            |                               |         |         |
| 0                                                                                      | -                    | 316                        | 22.8                       | 0                             | 0       | 0       |
| 10                                                                                     | -                    | 261 <sup>†</sup>           | 3.1                        | 3.4                           | 0       | 0       |
| 25                                                                                     | -                    | 217                        | 2.8                        | 48.4                          | 5.5     | 0       |
| 50                                                                                     | -                    | 149                        | 2.0                        | 65.1                          | 10.1    | 15.4    |
| Buffer                                                                                 | -                    | 100                        | 27.0                       | 0                             | 0       | 0       |

Either *nkx2.5* mRNA alone or *nkx2.5* mRNA plus *ecx* MO was injected into fertilized wild-type eggs. Phenotype was scored at 48 hpf.

\*Pericardiac edema caused by *nkx2.5* overexpression was distinguishable from that of *ftk*; even overexpression of *nkx2.5* itself produced pericardiac edema in zebrafish [Chen JN, Fishman MC (1996) Zebrafish tinman homolog demarcates the heart field and initiates myocardial differentiation. *Development* 122:3809–3816].

<sup>†</sup>Genotyping was performed on embryos with wild-type phenotype. Nineteen embryos out of 96 examined were confirmed to be genotypically *ftk* homozygous mutants.
